# Supplementary material
Source: PubMed Central journal article supplement (PMC3340146)

## Supplementary Information

### Figure Legend

**Supplemental Figure 1. KLF4 protein level remains unchanged in response to E2 treatment in MDA-MB-231 cells.** Cells were hormone stripped for 48h and then treated with E2 at 10nM for the indicated time. KLF4 and ER $\alpha$  protein levels were analyzed by immunoblotting.  $\beta$ -actin was used as loading control. MCF-7 cell lysate served as positive control for ER $\alpha$  expression.

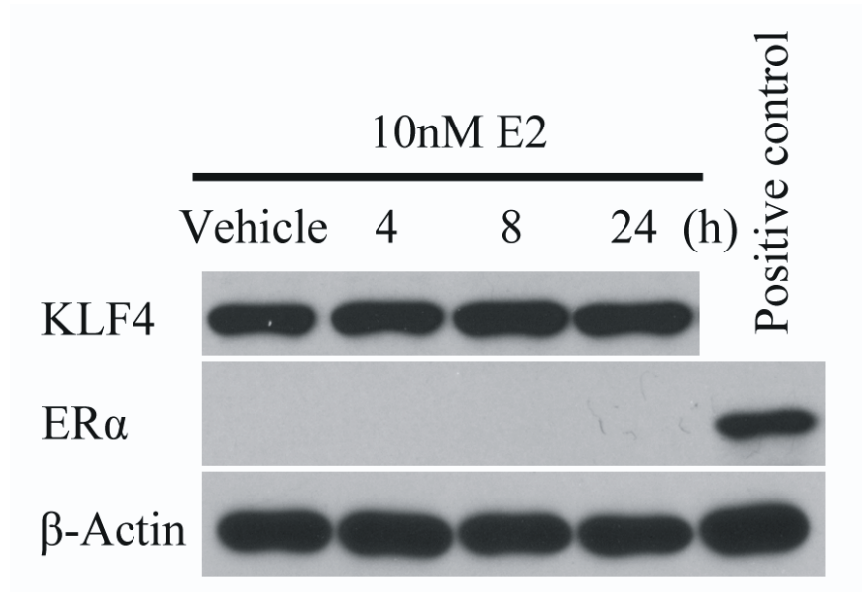

Supplement: supp_M112.343566_jbc.M112.343566-1.pdf [file supp_M112.343566_jbc.M112.343566-1.pdf]
